# Supplementary material for: 84.0% energy-efficient nitrate conversion by a defective (Fe,Cu,Ni)2O3 electrocatalyst
Source: Royal Society of Chemistry journal article supplement (doi:10.1039/d4ta02801e), 2024-01-01
Supplement: d4ta02801e1.pdf [file d4ta02801e1.pdf]

## Supplementary Information

1

2

### 3 **84.0% Energy-efficient nitrate conversion by defective (Fe,Cu,Ni)<sub>2</sub>O<sub>3</sub>** 4 **electrocatalyst**

5

6 Tadele Negash Gameda<sup>1,3</sup>, Dong-Hau Kuo<sup>1,2\*</sup>, Quoc-Nam Ha<sup>1</sup>, Noto Susanto Gultom<sup>1</sup>, Girma  
7 Sisay Wolde<sup>1</sup>

8

9 <sup>1</sup> Department of Materials Science and Engineering, National Taiwan University of Science and  
10 Technology, No. 43, Sec. 4, Keelung Road, Taipei 10607, Taiwan.

11 <sup>2</sup> Graduate Institute of Energy and Sustainability Technology, National Taiwan University of  
12 Science and Technology, No. 43, Sec. 4, Keelung Road, Taipei 10607, Taiwan.

13 <sup>3</sup> Department of Chemical Engineering, Adama Science and Technology University, P.O. Box  
14 1888 Adama, Ethiopia.

15

16

17 \*Corresponding author

18 Fax: +011-886-2-27303291. E-mail: [dhkuo@mail.ntust.edu.tw](mailto:dhkuo@mail.ntust.edu.tw)

19

20

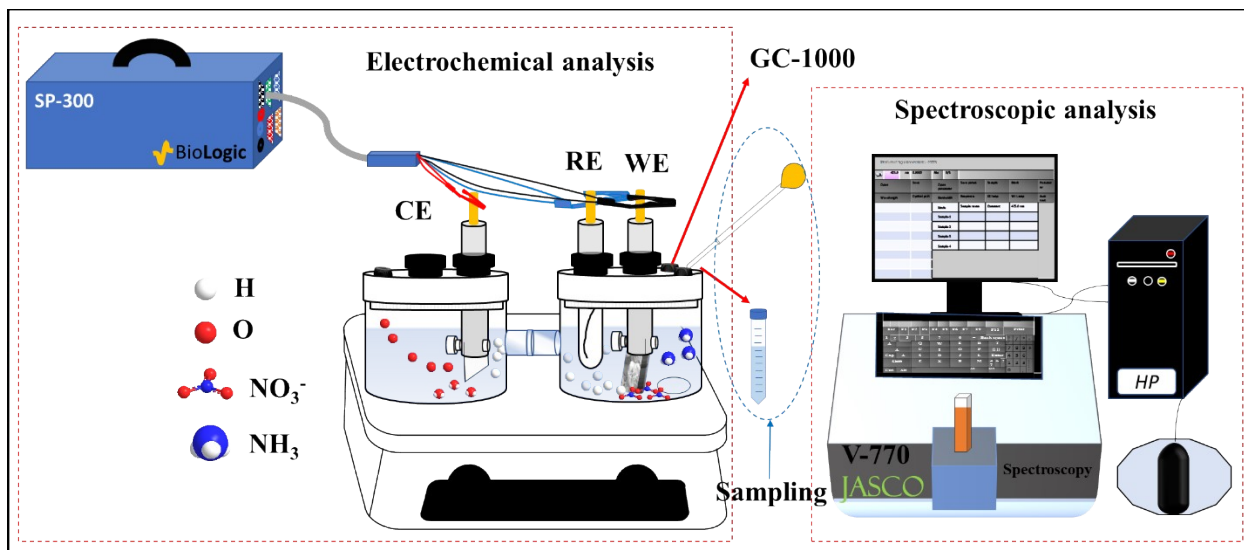

21

22 **Figure S1.** Batchwise H-cell compartment configuration for electrochemical analysis with the  
 23 corresponding spectroscopic measuring setup.

24

25

26

27

28

29

30

31

32

33

34

35

36

37

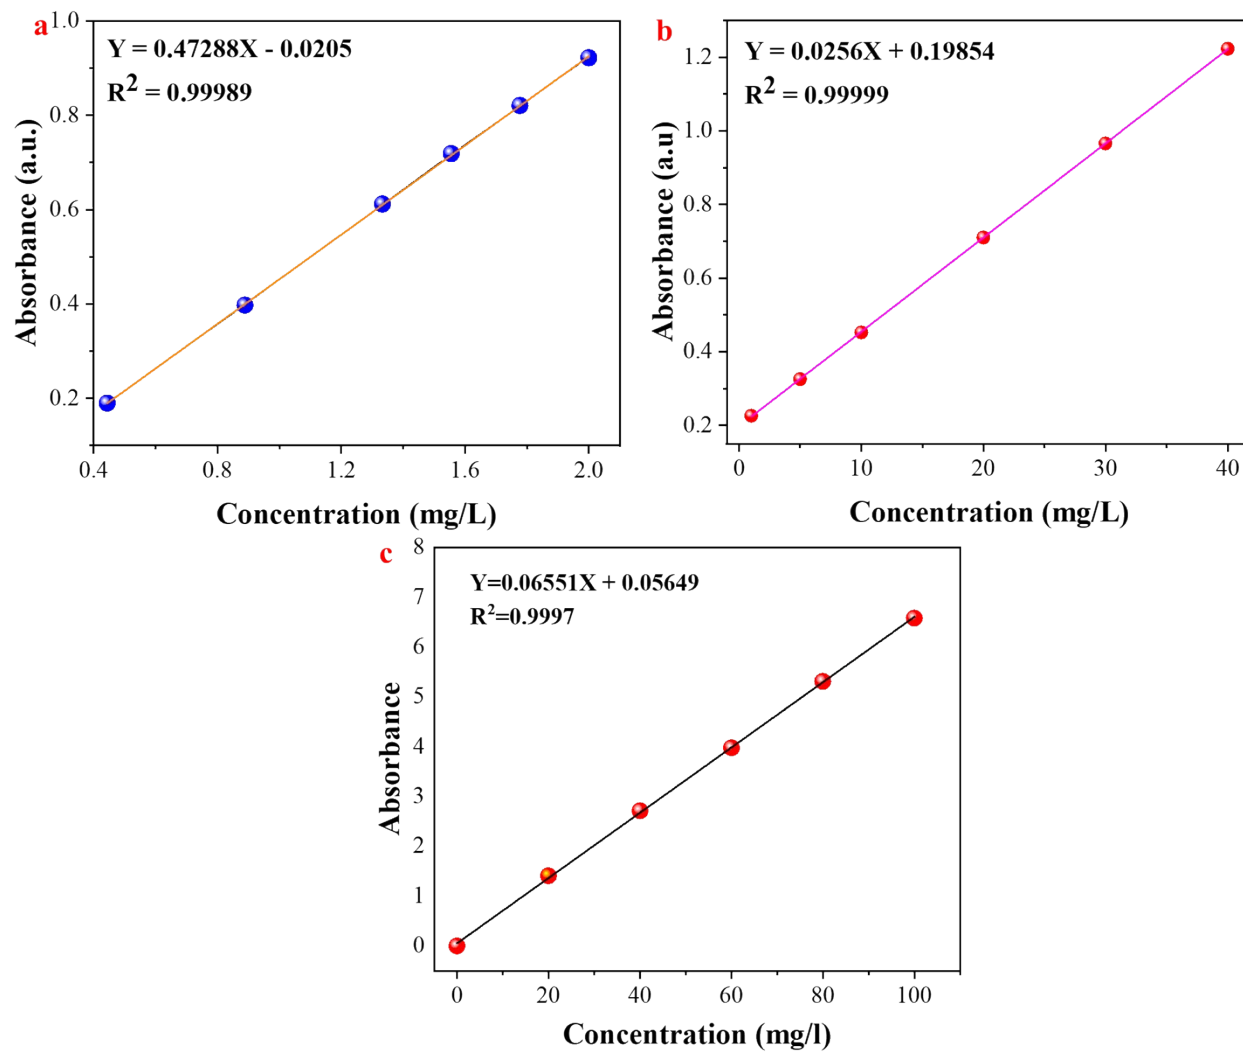

38

39

Figure S2. UV-Vis calibration for (a)  $\text{NH}_3$ , (b)  $\text{NO}_2^-$ , and (c)  $\text{N}_2\text{H}_4$  detection.

40

41

42

43

44

45

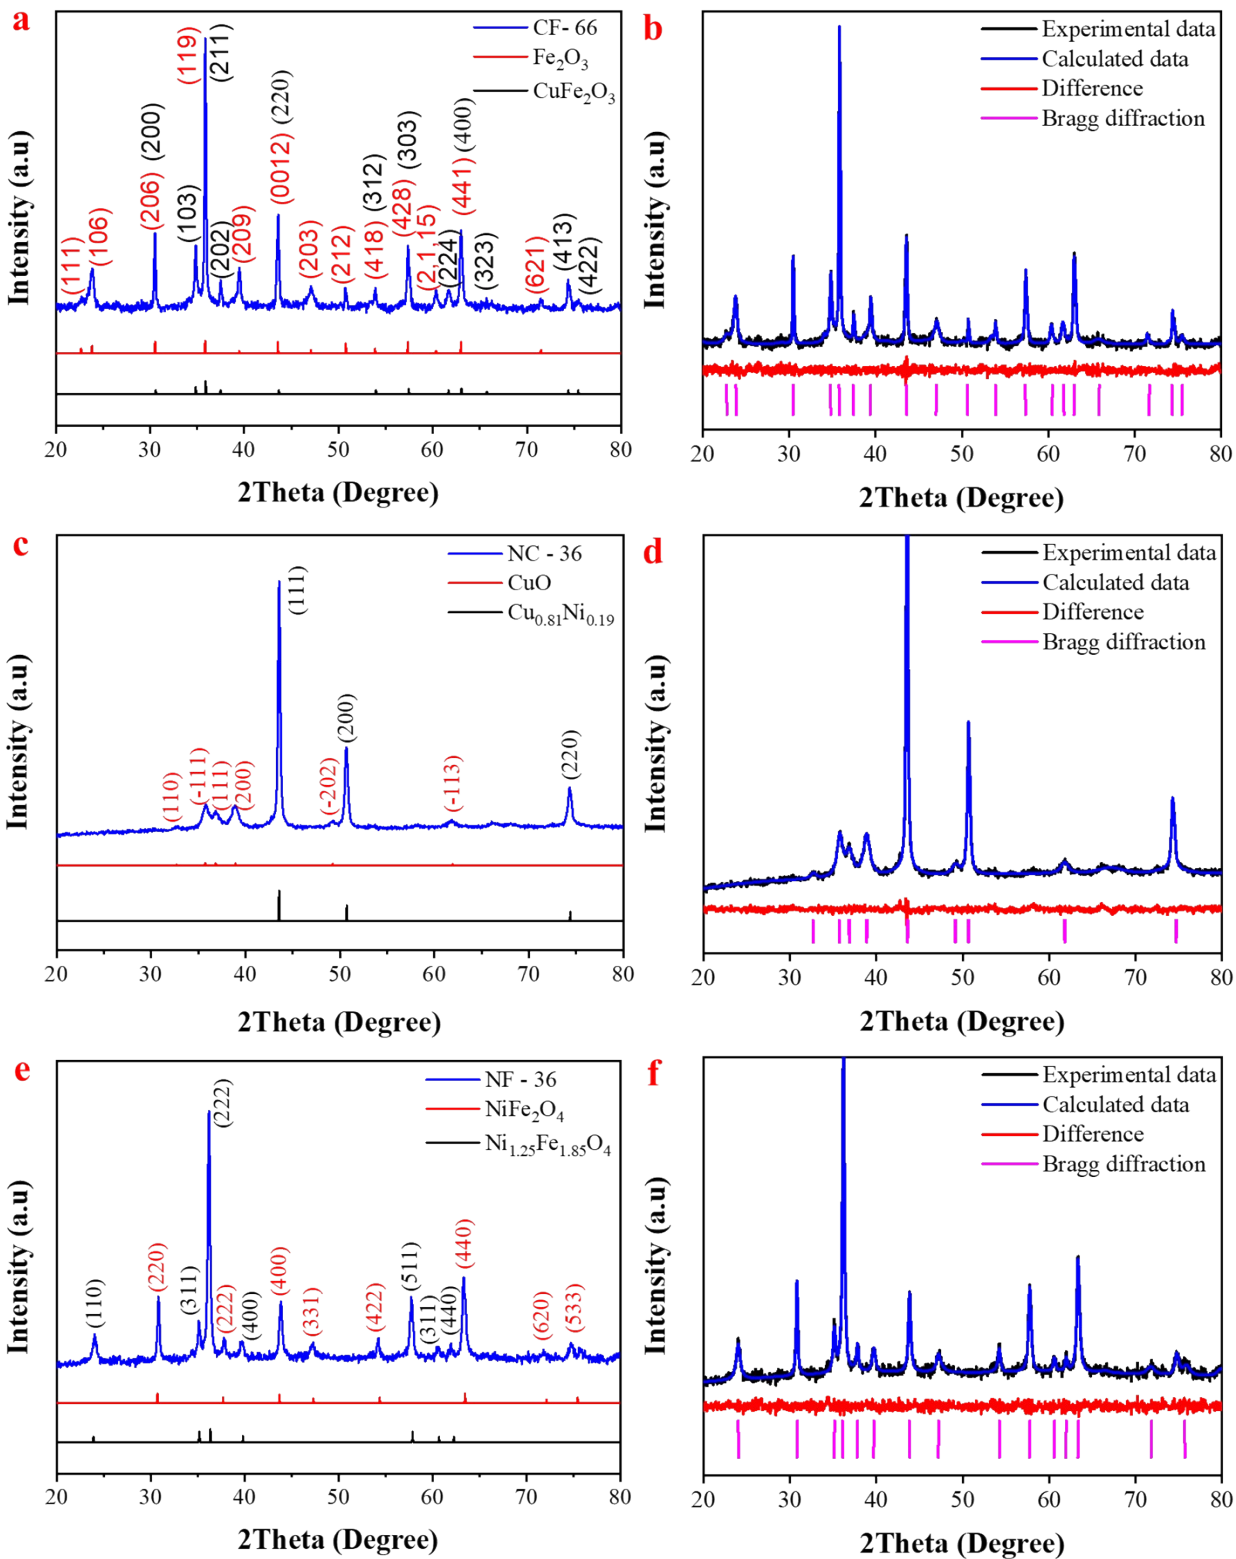

46

47 **Figure S3.** X-ray diffraction (XRD) pattern and the corresponding Rietveld refinement for  
 48 bimetallic-oxide system (a-b) CF-66, (c-d) NC-36, and (e-f) NF-36.

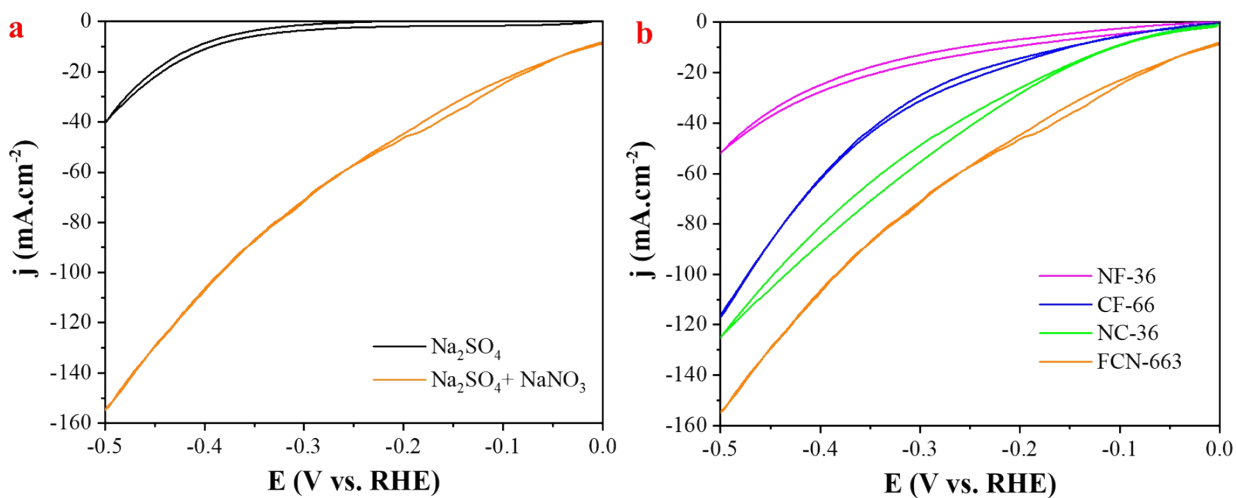

49

50 **Figure S4.** (a) CV curves of FCN-663 metal-oxide system in Na<sub>2</sub>SO<sub>4</sub> electrolyte with and without  
 51 NaNO<sub>3</sub>, (b) CV curves of ternary metallic oxide system (FCN-663) with the bimetallic system  
 52 (NC-36, CF-66, and NF-36).

53

54

55

56

57

58

59

60

61

62

63

64

65

66

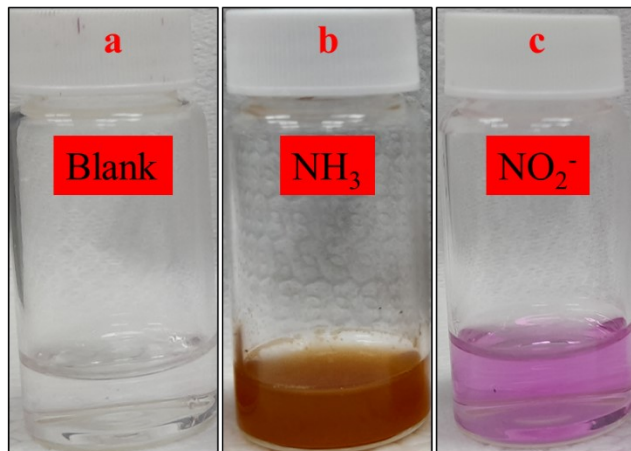

67

68 [Figure S5](#). The appearance of nitrate reduction product and by-product, (a) Blank, (b) NH<sub>3</sub>, and  
69 (c) NO<sub>2</sub><sup>-</sup>, of a ternary FCN-663 metal-oxide system after a 2 h batch reaction at -0.3 V vs. RHE  
70 using H-cell.

71

72

73

74

75

76

77

78

79

80

81

82

83

84

85

86

87

88

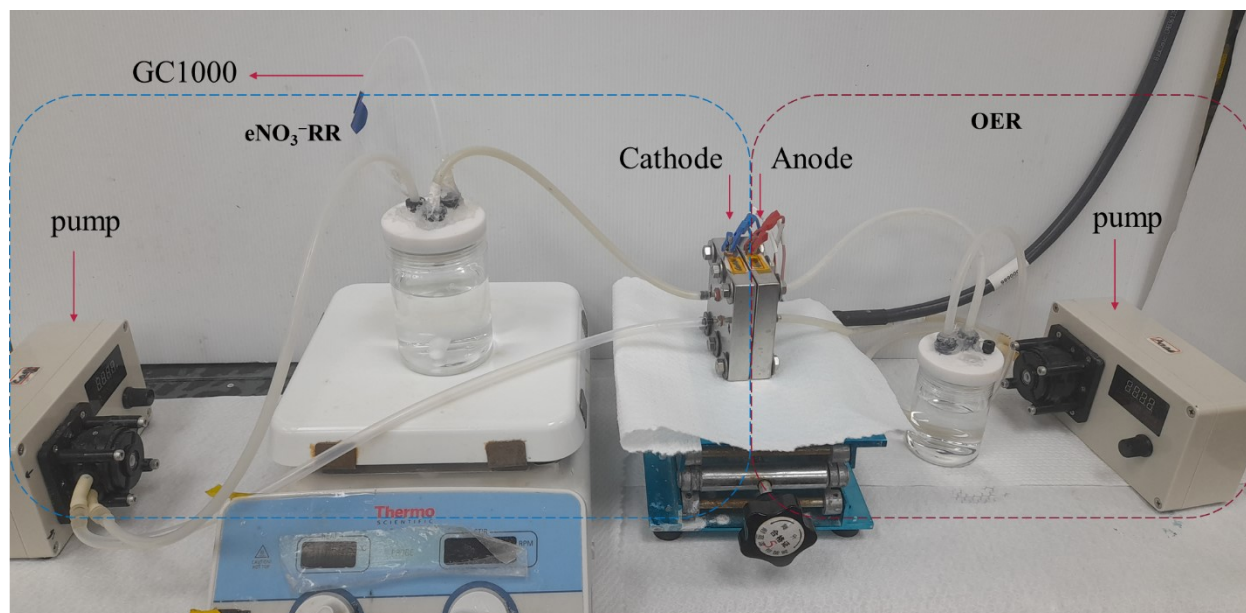

89

90

Figure S6 Single-stack flow cell electrolyzer set-up.

91

92

93

94

95

96

97

98

99

100  
101  
102  
103  
104

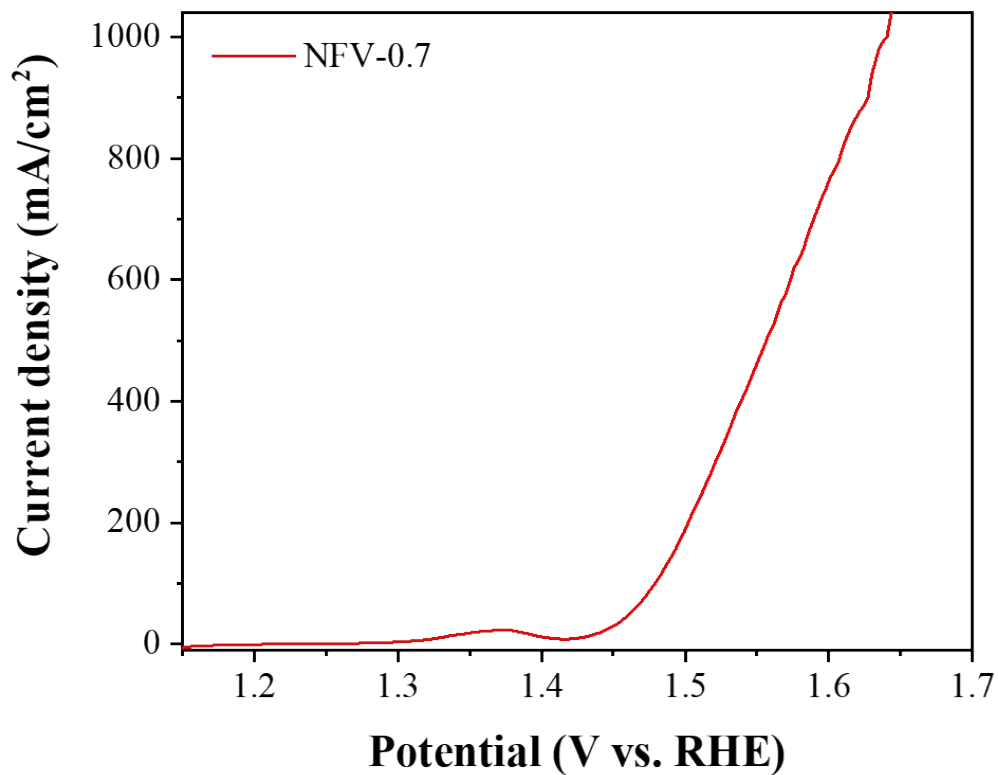

105  
106  
107  
108  
109  
110  
111  
112

Figure S7. LSV curve of NFV-0.7 (previously prepared by our group) as OER electrode for anode side.



113  
114  
115  
116  
117

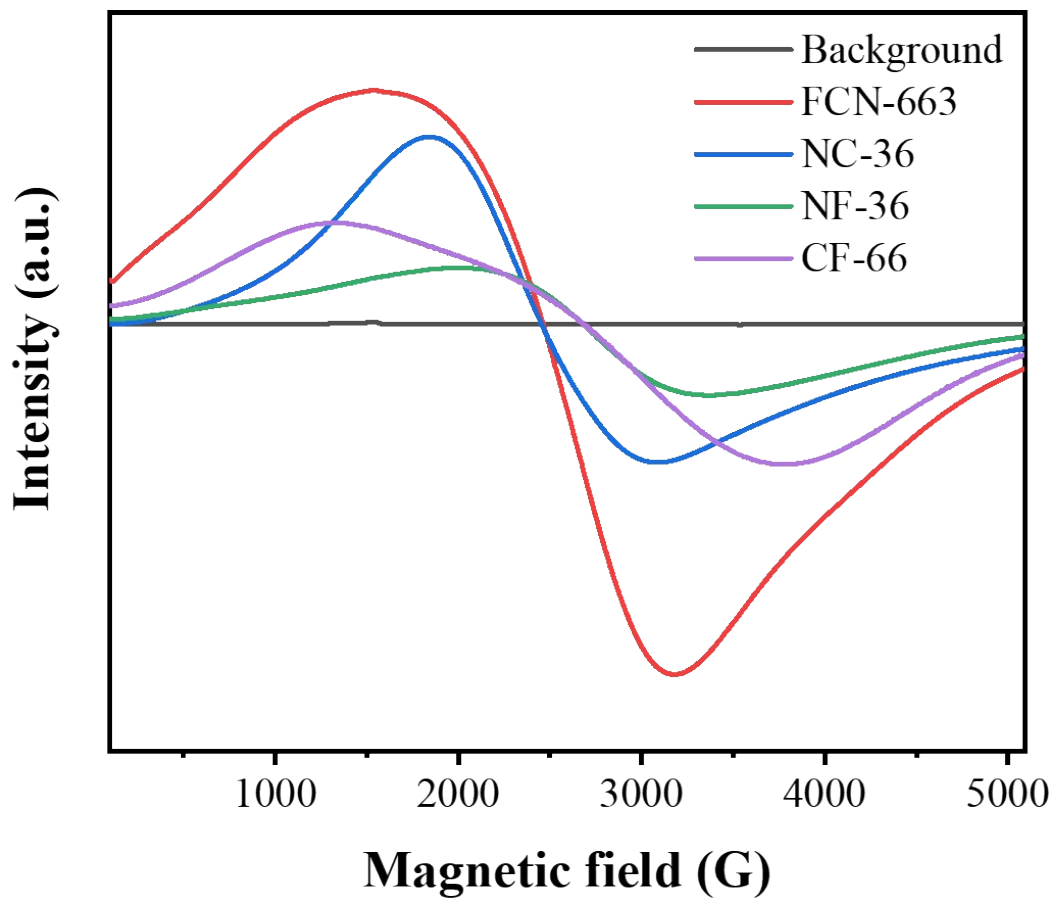

118

119 **Figure S8.** EPR spectra of the trimetallic oxide system (FCN-663) and the bimetallic systems  
120 (NC-36, CF-66, and NF-36).

121

122

123

124

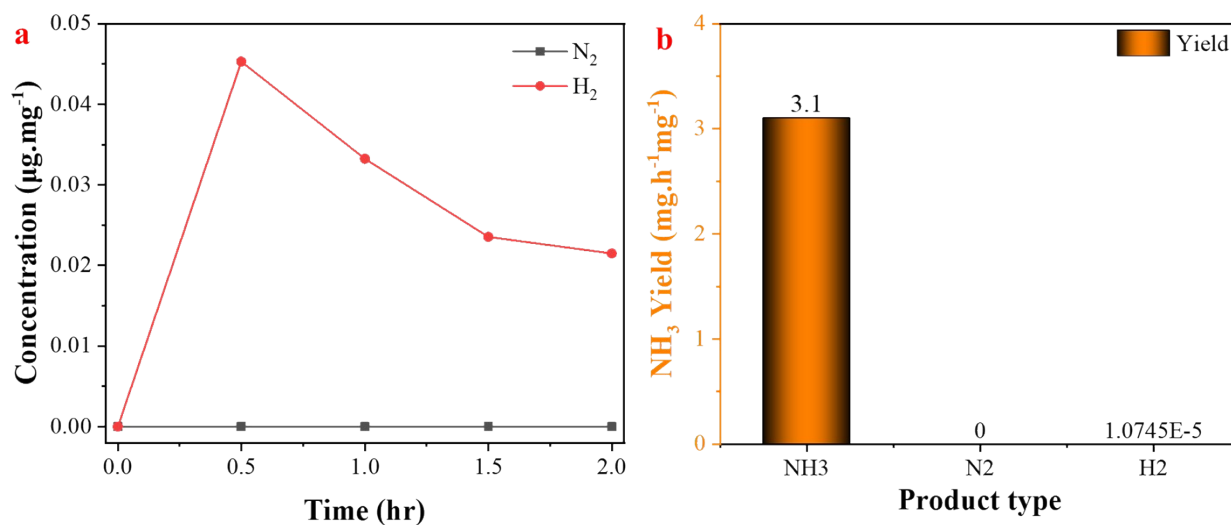

125

126

127 **Figure S9.** By product analysis and comparison, a) concentration vs. reaction time and b) yield vs.  
128 product type ( $NH_3$ ,  $N_2$ , and  $H_2$ ) of a ternary FCN-663 metal-oxide system after a 2 h reaction at -  
129 0.3 V vs. RHE.

130

131

132

133

134

135

136

137 **Table S1.** Synthesized materials system naming and their sample size with mass loading

| <b>No.</b> | <b>Catalyst</b> | <b>Ratio<br/>(in mmol)</b> | <b>Labeling</b> | <b>Weight<br/>(mg)</b> | <b>Sample size<br/>(cm<sup>2</sup>)</b> |
|------------|-----------------|----------------------------|-----------------|------------------------|-----------------------------------------|
| <b>1</b>   | Fe-Cu-Ni        | 6:6:3                      | FCN-663         | 3                      | 1x1                                     |
| <b>2</b>   | Ni-Cu           | 3:6                        | NC-36           | 2.53                   | 1x1                                     |
| <b>3</b>   | Cu-Fe           | 6:6                        | CF-66           | 2.82                   | 1x1                                     |
| <b>4</b>   | Ni-Fe           | 3:6                        | NF-36           | 2.61                   | 1x1                                     |

138

139

140

141

142

143

144

145

146

147

148

149

150

151 **Table S2.** Lattice parameter, cell volume, and angle of bimetallic and trimetallic metallic oxide

152 systems

| <b>Samples</b> | XRD phase                                            | Lattice parameter |              | Cell volume<br>V (Å <sup>3</sup> ) | Angle, β |
|----------------|------------------------------------------------------|-------------------|--------------|------------------------------------|----------|
|                |                                                      | <b>A (Å)</b>      | <b>c (Å)</b> |                                    |          |
| <b>CF-66</b>   | Fe <sub>2</sub> O <sub>3</sub>                       | 4.913             | 14.128       | 295.43                             | 57.86    |
|                | CuFe <sub>2</sub> O <sub>4</sub>                     | 5.93              | 8.65         | 304.78                             | 1.91     |
| <b>NC-36</b>   | CuO <sub>0.81</sub> NiO <sub>0.19</sub>              | 3.619             | -            | 47.4                               | 17.7     |
|                | CuO                                                  | 4.8846            | 4.1357       | 96.5661                            | 21.5     |
| <b>NF-36</b>   | Ni <sub>1.25</sub> Fe <sub>1.85</sub> O <sub>4</sub> | 8.52902           | -            | 620.43                             | 25.4     |
|                | NiFe <sub>2</sub> O <sub>4</sub>                     | 8.3189            | -            | 575.72                             | 81.03    |
| <b>FCN-663</b> | Fe <sub>2</sub> O <sub>3</sub>                       | 5.17959           | 13.73        | 304.289                            | 508.74   |
|                | Cu <sub>0.81</sub> Ni <sub>0.19</sub>                | 4.03018           | -            | 65.459                             | 19.1     |

153

154

155

156

157

158

159

160

161

162

163

164 **Table S3.** XPS compositional analysis of the FCN-663 oxide system grown on Ni foam

| Element | Ni    | Cu    | Fe    | O     |
|---------|-------|-------|-------|-------|
| at. %   | 12.69 | 17.67 | 15.93 | 53.72 |

165

166 **Table S4.** Valence state proportion of FCN-663 through the deconvoluted peak fitting of XPS peak

167 area

| Element                       | Ni               |                  | Cu              | Fe               |                  | O              |                |                  |
|-------------------------------|------------------|------------------|-----------------|------------------|------------------|----------------|----------------|------------------|
|                               | Ni <sup>2+</sup> | Ni <sup>3+</sup> | Cu <sup>+</sup> | Fe <sup>2+</sup> | Fe <sup>3+</sup> | O <sub>L</sub> | O <sub>V</sub> | O <sub>ads</sub> |
| at. %                         | 17.72            | 82.28            |                 | 33.74            | 66.26            | 59.63          | 37.15          | 3.23             |
| <b>Data from Table S3 (%)</b> | 2.25             | 10.44            | 17.67           | 5.38             | 10.56            | 32.03          | 19.96          | 1.74             |

168

169

170

171

172

173

174

175

176

177

178

179

180

181

182 **Table S5.** Comparison of NH<sub>3</sub> yield and Faradic efficiency (FE) of the reported electrocatalysts

183 with good performance

| Catalyst                                                                                    | Electrolyte                                                                            | Potential V vs. RHE       | Catalyst amount             | NH <sub>3</sub> Yield                                                                                                                                              | FE (%) | Ref.          |
|---------------------------------------------------------------------------------------------|----------------------------------------------------------------------------------------|---------------------------|-----------------------------|--------------------------------------------------------------------------------------------------------------------------------------------------------------------|--------|---------------|
| Fe <sub>2</sub> O <sub>3</sub> /<br>Cu <sub>0.81</sub> Ni <sub>0.1</sub><br>9<br>nanoflower | 0.5 M Na <sub>2</sub> SO <sub>4</sub><br>(168 ppm NaNO <sub>3</sub> )                  | - 0.3                     | 3 mg<br>1 cm <sup>2</sup>   | 9.18 mg.h <sup>-1</sup> .cm <sup>-2</sup><br>3.06 mg.h <sup>-1</sup> .mg <sub>cat</sub> <sup>-1</sup><br>0.54 mmol h <sup>-1</sup> .cm <sup>-2</sup>               | 94.79  | This work     |
| Cu-Fe <sub>2</sub> O <sub>3</sub> -<br>x                                                    | 0.5 M Na <sub>2</sub> SO <sub>4</sub><br>(50 ppm NO <sub>3</sub> <sup>-</sup> )        | - 0.6                     | 0.89<br>mg cm <sup>-2</sup> | 0.108 mmol h <sup>-1</sup> .cm <sup>-2</sup><br>1.836 mg h <sup>-1</sup> .cm <sup>-2</sup>                                                                         | 80.1   | <sup>1</sup>  |
| Cu/Cu <sub>2</sub> O<br>NWAs                                                                | 0.5 M Na <sub>2</sub> SO <sub>4</sub><br>(200 ppm<br>Na <sub>2</sub> SO <sub>4</sub> ) | - 0.85                    | 1 cm <sup>2</sup>           | 0.2449 mmol h <sup>-1</sup> .cm <sup>-2</sup><br>4.1633 mg h <sup>-1</sup> .cm <sup>-2</sup>                                                                       | 95.8   | <sup>2</sup>  |
| Cu-Ni<br>alloys                                                                             | 0.1 M Na <sub>2</sub> SO <sub>4</sub><br>(0.01 M NaNO <sub>3</sub> )                   | - 0.7                     | 0.25 cm <sup>2</sup>        | --                                                                                                                                                                 | 94.56  | <sup>3</sup>  |
| CuNi/NC-<br>51                                                                              | 0.05 M Na <sub>2</sub> SO <sub>4</sub><br>(50 ppm NO <sub>3</sub> <sup>-</sup> )       | - 1                       | 2.25 cm <sup>2</sup>        | -                                                                                                                                                                  | 79.6   | <sup>4</sup>  |
| CoP/TiO <sub>2</sub>                                                                        | 0.1 M NaOH<br>(NaNO <sub>3</sub> )                                                     | - 0.3                     | 0.25 cm <sup>2</sup>        | 297.2 μmol h <sup>-1</sup> .cm <sup>-2</sup><br>5.0524 mg h <sup>-1</sup> .cm <sup>-2</sup>                                                                        | 95     | <sup>5</sup>  |
| Cu <sub>49</sub> Fe <sub>1</sub>                                                            | 0.1 M K <sub>2</sub> SO <sub>4</sub><br>(2 mM KNO <sub>3</sub> )                       | - 0.74                    | 0.196 cm <sup>2</sup>       | 0.23 mmol h <sup>-1</sup> .cm <sup>-2</sup><br>3.91 mg h <sup>-1</sup> .cm <sup>-2</sup>                                                                           | 94.5   | <sup>6</sup>  |
| Ni/Cu <sub>2</sub> O/<br>Co(OH) <sub>x</sub>                                                | 12.5 mM Na <sub>2</sub> SO <sub>4</sub><br>(30 mg/L NO <sub>3</sub> <sup>-</sup> )     | 40<br>mA.cm <sup>-2</sup> | 2.25 cm <sup>2</sup>        | 1.22 mmol g <sub>cat</sub> <sup>-1</sup><br>20.74 mg h <sup>-1</sup> .g <sub>cat</sub> <sup>-1</sup><br>0.0207 mg h <sup>-1</sup> .mg <sub>cat</sub> <sup>-1</sup> | 22     | <sup>7</sup>  |
| Cu-Fe <sub>3</sub> O <sub>4</sub>                                                           | 0.05 M Na <sub>2</sub> SO <sub>4</sub><br>(100 mg/L NO <sub>3</sub> <sup>-</sup> )     | 25<br>mA/cm <sup>2</sup>  | 4 cm <sup>2</sup>           | -                                                                                                                                                                  | 50.3   | <sup>8</sup>  |
| NiFe <sub>2</sub> O <sub>4</sub> /<br>CC                                                    | 0.1 M PBS<br>(0.1 M NaNO <sub>3</sub> )                                                | - 0.6                     | -                           | 2.98 mg.h <sup>-1</sup> .cm <sup>-2</sup><br>@-0.6<br>10.6 mg.h <sup>-1</sup> .cm <sup>-2</sup><br>@ -1.0 V                                                        | 96.6   | <sup>9</sup>  |
| Fe-Co <sub>3</sub> O <sub>4</sub><br>NA/TM                                                  | 0.1 M PBS<br>(50 mM NO <sub>3</sub> )                                                  | - 0.7                     | 1 cm <sup>2</sup>           | 0.624<br>mg h <sup>-1</sup> .mg <sub>cat</sub> <sup>-1</sup>                                                                                                       | 95.5   | <sup>10</sup> |
| Au <sub>1</sub> Cu<br>(111)                                                                 | 0.1 M KOH<br>(7.1 mM KNO <sub>3</sub> )                                                | - 0.2                     | 3 cm <sup>2</sup>           | 0.55<br>mg h <sup>-1</sup> .cm <sup>-2</sup>                                                                                                                       | 97     | <sup>11</sup> |
| 10 Cu/<br>TiO <sub>2-x</sub>                                                                | 0.5 M Na <sub>2</sub> SO <sub>4</sub><br>(3.2 mM NaNO <sub>3</sub> )                   | - 0.75                    | 3 cm <sup>2</sup>           | 1.94 mg h <sup>-1</sup> .cm <sup>-2</sup><br>0.1143 mmol h <sup>-1</sup> .mg <sup>-1</sup>                                                                         | 81.34  | <sup>12</sup> |

184

185

187 **Reference**

- 188 1. Y. Gao, K. Huang, C. Yan, S. Li, H. Zhang, L. Cheng and F. Huang, *Mater. Adv.*, 2022, **3**,  
189 7107-7115.
- 190 2. Y. Wang, W. Zhou, R. Jia, Y. Yu and B. Zhang, *Angew. Chem. Int. Ed.*, 2020, **59**, 5350-  
191 5354.
- 192 3. Z. Bai, X. Li, L. Ding, Y. Qu and X. Chang, *Science China Materials*, 2023, **66**, 2329-2338.
- 193 4. Y. Liu, B. Deng, K. Li, H. Wang, Y. Sun and F. Dong, *J Colloid Interf Sci*, 2022, **614**, 405-  
194 414.
- 195 5. Z. Deng, C. Ma, X. Fan, Z. Li, Y. Luo, S. Sun, D. Zheng, Q. Liu, J. Du, Q. Lu, B. Zheng and  
196 X. Sun, *Materials Today Physics*, 2022, **28**, 100854.
- 197 6. C. Wang, Z. Liu, T. Hu, J. Li, L. Dong, F. Du, C. Li and C. Guo, *ChemSusChem*, 2021, **14**,  
198 1825-1829.
- 199 7. G. A. Cerrón-Calle, A. Wines and S. Garcia-Segura, *Appl. Catal. B*, 2023, **328**, 122540.
- 200 8. Z. Zhang, G. Xin, Y. Pan, Z. Chen, Y. Sun, C. Wang, S. Li, L. Wei, Z. Fu and W. Ma,  
201 *Journal of Cleaner Production*, 2023, **383**, 135388.
- 202 9. L. Xie, L. Hu, Q. Liu, S. Sun, L. Zhang, D. Zhao, Q. Liu, J. Chen, J. Li, L. Ouyang, A. A.  
203 Alshehri, Q. Kong and X. Sun, *Inorganic Chemistry Frontiers*, 2022, **9**, 3392-3397.
- 204 10. P. Wei, J. Liang, Q. Liu, L. Xie, X. Tong, Y. Ren, T. Li, Y. Luo, N. Li, B. Tang, A. M. Asiri,  
205 M. S. Hamdy, Q. Kong, Z. Wang and X. Sun, *J Colloid Interf Sci*, 2022, **615**, 636-642.
- 206 11. Y. Zhang, X. Chen, W. Wang, L. Yin and J. C. Crittenden, *Applied Catalysis B:  
207 Environmental*, 2022, **310**, 121346.

208 12. X. Zhang, C. Wang, Y. Guo, B. Zhang, Y. Wang and Y. Yu, *J Mater Chem A*, 2022, **10**,  
209 6448-6453.  
210
